# Supplementary material
Source: HighWire-hosted journal article supplement (https://dmd.aspetjournals.org/highwire/filestream/74180/field_highwire_adjunct_files/0/88914_VDss_2019__SI_09232019.pdf)
Supplement: 88914_VDss_2019__SI_09232019.pdf [file 88914_VDss_2019__SI_09232019.pdf]

**SUPPORTING INFORMATION FOR:**

**AN ACCURATE IN VITRO PREDICTION OF HUMAN  $VD_{ss}$  BASED ON THE ØIE-TOZER EQUATION AND PRIMARY PHYSICOCHEMICAL DESCRIPTORS. 3. ANALYSIS AND ASSESSMENT OF PREDICTIVITY ON A LARGE DATASET.**

Giuliano Berellini and Franco Lombardo\*

Drug Metabolism and Bioanalysis Group, Alkermes Inc., Waltham, MA, 02451

**SUPPLEMENTAL TABLE 1.** Prediction performance for  $VD_{ss}$  and  $f_{ut}$  using Model 1

for the 8 compounds with human  $f_{ut} < 0$ .

| Compound            | $f_{up}$ | $\log D^{7.4}$ | Observed<br>$f_{ut}$ | Predicted<br>$f_{ut}$ | Observed<br>$VD_{ss}$<br>(L/kg) | Predicted<br>$VD_{ss}$<br>(L/kg) | Fold-<br>Error<br>$VD_{ss}$ |
|---------------------|----------|----------------|----------------------|-----------------------|---------------------------------|----------------------------------|-----------------------------|
| Cephalothin         | 0.22     | -2.2           | -1.54                | 1.36                  | 0.07                            | 0.19                             | 2.65                        |
| Diflunisal          | 0.0016   | 0.76           | -0.08                | 0.007                 | 0.097                           | 0.20                             | 2.02                        |
| Fenoprofen          | 0.02     | 1.74           | -1.18                | 0.02                  | 0.1                             | 0.42                             | 4.17                        |
| Glyburide           | 0.021    | 2.18           | -0.30                | 0.02                  | 0.08                            | 0.51                             | 6.40                        |
| Indomethacin        | 0.01     | 0.89           | -0.40                | 0.02                  | 0.096                           | 0.26                             | 2.76                        |
| Naproxen            | 0.002    | 0.33           | -0.05                | 0.01                  | 0.09                            | 0.18                             | 2.00                        |
| Suprofen            | 0.006    | -0.52          | -0.03                | 0.04                  | 0.04                            | 0.17                             | 4.18                        |
| Tiaprofenic<br>acid | 0.015    | -0.74          | -0.22                | 0.08                  | 0.08                            | 0.18                             | 2.19                        |

SUPPLEMENTAL TABLE 2. Prediction performance for  $VD_{ss}$  and  $f_{ut}$  using Model 2

for the 13 compounds with human  $f_{ut} > 1$ .

| Compound                | $f_{up}$ | $\log D_{7.4}$ | Observed<br>$f_{ut}$ | Predicted<br>$f_{ut}$ | Observed<br>$VD_{ss}$<br>(L/kg) | Predicted<br>$VD_{ss}$<br>(L/kg) | Fold-<br>Error<br>$VD_{ss}$ |
|-------------------------|----------|----------------|----------------------|-----------------------|---------------------------------|----------------------------------|-----------------------------|
| Acetylsalicylic<br>Acid | 0.68     | -2.57          | 4.77                 | 2.70                  | 0.22                            | 0.26                             | 1.19                        |
| Amoxicillin             | 0.85     | -3.2           | 4.69                 | 1.71                  | 0.25                            | 0.37                             | 1.48                        |
| Ampicillin              | 0.85     | -1.8           | 8.30                 | 0.99                  | 0.22                            | 0.51                             | 2.31                        |
| Cephalexin              | 0.85     | -1.1           | 11.18                | 0.81                  | 0.21                            | 0.58                             | 2.77                        |
| Cephaloridine           | 0.8      | -1.62          | 1.07                 | 1.84                  | 0.46                            | 0.34                             | 1.34                        |
| Cephradine              | 0.95     | -1.15          | 18.14                | 0.63                  | 0.21                            | 0.77                             | 3.64                        |
| Dicloxacillin           | 0.033    | -0.17          | 5.24                 | 0.09                  | 0.11                            | 0.25                             | 2.31                        |
| Enalaprilat             | 0.62     | -1             | 1.07                 | 0.23                  | 0.38                            | 1.19                             | 3.13                        |
| Metronidazole           | 0.96     | 0.12           | 1.75                 | 0.83                  | 0.4                             | 0.63                             | 1.57                        |
| Penicillin G            | 0.4      | -0.82          | 1.53                 | 0.73                  | 0.24                            | 0.35                             | 1.46                        |
| Piperacillin            | 0.5      | -2             | 1.58                 | 1.60                  | 0.27                            | 0.27                             | 1.01                        |
| Tolbutamide             | 0.05     | 0.36           | 1.75                 | 0.09                  | 0.12                            | 0.33                             | 2.73                        |
| Valproic Acid           | 0.08     | 0.13           | 1.08                 | 0.14                  | 0.14                            | 0.33                             | 2.37                        |

SUPPLEMENTAL TABLE 3. Prediction performance for  $VD_{ss}$  and  $f_{ut}$  using Model 3 for the 15 compounds with human  $f_{up} < 0.01$ .

| Compound           | $f_{up}$ | $\log D^{7.4}$ | Observed<br>$f_{ut}$ | Predicted<br>$f_{ut}$ | Observed<br>$VD_{ss}$<br>(L/kg) | Predicted<br>$VD_{ss}$<br>(L/kg) | Fold-<br>Error<br>$VD_{ss}$ |
|--------------------|----------|----------------|----------------------|-----------------------|---------------------------------|----------------------------------|-----------------------------|
| Amiodarone         | 0.0002   | 5.95           | 0.0000013            | 0.0000124             | 60                              | 6.25                             | 9.59                        |
| Candesartan        | 0.002    | -1.35          | 0.0302               | 0.0252                | 0.13                            | 0.14                             | 1.04                        |
| Carprofen          | 0.001    | 1.09           | 0.0033               | 0.0042                | 0.22                            | 0.19                             | 1.13                        |
| Diclofenac         | 0.005    | 1.22           | 0.0165               | 0.0125                | 0.22                            | 0.26                             | 1.17                        |
| Felodipine         | 0.0036   | 4.52           | 0.0003               | 0.0017                | 4.4                             | 0.90                             | 4.92                        |
| Fluvastatin        | 0.0079   | 1.4            | 0.0095               | 0.0158                | 0.42                            | 0.30                             | 1.42                        |
| Ibuprofen          | 0.006    | 1              | 0.051                | 0.016                 | 0.15                            | 0.25                             | 1.65                        |
| Itraconazole       | 0.002    | 5.9            | 0.000104             | 0.000549              | 7.4                             | 1.49                             | 4.97                        |
| Ketoprofen         | 0.008    | 0.19           | 0.123                | 0.030                 | 0.13                            | 0.21                             | 1.59                        |
| Meloxicam          | 0.003    | 0.07           | 0.0253               | 0.0159                | 0.15                            | 0.18                             | 1.18                        |
| Minocycline        | 0.005    | -0.04          | 0.00127              | 0.00267               | 1.6                             | 0.82                             | 1.96                        |
| Sulfasalazine      | 0.004    | 0.8            | 0.304                | 0.013                 | 0.11                            | 0.22                             | 1.99                        |
| Tebufelone         | 0.0007   | 5.63           | 0.000022             | 0.000298              | 12                              | 0.996                            | 12.05                       |
| Tenoxicam          | 0.0085   | -0.32          | 0.0382               | 0.0412                | 0.19                            | 0.18                             | 1.03                        |
| Tolfenamic<br>acid | 0.003    | 2.1            | 0.0207               | 0.0054                | 0.16                            | 0.31                             | 1.96                        |

SUPPLEMENTAL TABLE 4. Prediction performance for  $VD_{ss}$  using Model 1 and 1c for the 20 compounds compared with in vivo O-T prediction in 3 animal species.<sup>a</sup>

| Compound       | $VD_{ss}$<br>human<br>(L/kg) | $f_{up}$<br>human | Predicted $VD_{ss}$<br>O-T<br>rat-dog-monkey <sup>a</sup><br>(L/kg) | Predicted<br>$VD_{ss}$<br>Model 1<br>(L/kg) | Predicted<br>$VD_{ss}$<br>Model 1c<br>(L/kg) |
|----------------|------------------------------|-------------------|---------------------------------------------------------------------|---------------------------------------------|----------------------------------------------|
| Bisoprolol     | 2.4                          | 0.66              | 1.66                                                                | 2.45                                        | 3.77                                         |
| Ciprofloxacin  | 2.1                          | 0.7               | 2.32                                                                | 1.67                                        | 2.39                                         |
| Citalopram     | 12                           | 0.2               | 5.24                                                                | 4.48                                        | 7.78                                         |
| Diclofenac     | 0.22                         | 0.05              | 0.17                                                                | 0.26                                        | 0.24                                         |
| Fleroxacin     | 1.6                          | 0.73              | 1.43                                                                | 1.64                                        | 1.88                                         |
| Furosemide     | 0.12                         | 0.01              | -                                                                   | -                                           | -                                            |
| Gatifloxacin   | 1.7                          | 0.8               | 1.77                                                                | 2.12                                        | 2.65                                         |
| Metoprolol     | 3.1                          | 0.88              | 5.49                                                                | 2.34                                        | 3.31                                         |
| Midazolam      | 1.1                          | 0.02              | 0.58                                                                | 0.84                                        | 0.87                                         |
| Morphine       | 2.3                          | 0.65              | 2.72                                                                | 2.66                                        | 2.68                                         |
| Moxifloxacin   | 1.4                          | 0.6               | 2.78                                                                | 2.52                                        | 3.19                                         |
| Pefloxacin     | 1.5                          | 0.75              | 2.76                                                                | 1.41                                        | 2.48                                         |
| Piperacillin   | 0.27                         | 0.5               | -                                                                   | -                                           | -                                            |
| Prednisone     | 0.57                         | 0.27              | 1.09                                                                | 0.59                                        | 0.70                                         |
| Propranolol    | 3.1                          | 0.13              | 8.57                                                                | 3.25                                        | 3.27                                         |
| Quinidine      | 2.9                          | 0.26              | 2.89                                                                | 3.65                                        | 4.95                                         |
| Sulfinpyrazone | 0.12                         | 0.02              | 0.12                                                                | 0.15                                        | 0.16                                         |

|               |      |      |             |             |             |
|---------------|------|------|-------------|-------------|-------------|
| Theophylline  | 0.51 | 0.61 | 0.52        | 0.54        | 0.41        |
| Trovafloxacin | 1.3  | 0.24 | 1.34        | 4.29        | 2.01        |
| Valproic acid | 0.14 | 0.08 | 0.17        | 0.29        | 0.30        |
| Venlafaxine   | 4.4  | 0.73 | 3.88        | 4.97        | 7.00        |
| Verapamil     | 3.7  | 0.09 | 1.47        | 5.91        | 8.57        |
| <b>GMFE</b>   |      |      | <b>1.44</b> | <b>1.36</b> | <b>1.44</b> |

a. In vivo data taken from Lombardo et al. 2013. The set comprises the compound from this work overlapping with the 60 compounds set reported in model V7 in that reference. Furosemide and piperacillin were excluded as in each case one species gave an aberrant ( $f_{ut} < 0$ ) result.
